# Supplementary material for: A regime view of future atmospheric circulation changes in Northern mid-latitudes
Source: Copernicus journal article supplement (doi:10.5194/wcd-2020-37), 2020-08-18
Supplement: Supplementary file 1 [file wcd-2020-37-supplement.pdf]

# A regime view of future atmospheric circulation changes in Northern mid-latitudes

F. Fabiano, V. Meccia, P. Davini, P. Ghinassi, S. Corti

## Supplementary material

Table S1. Models and ensemble members used in the analysis. Hist stands for historical simulation and ssps means that SSP126, SSP245, SSP370, SSP585 were all analyzed for that model/member (for CMIP6).

| CMIP5          |        |             | CMIP6           |          |            |
|----------------|--------|-------------|-----------------|----------|------------|
| Model          | Member | Experiment  | Model           | Member   | Experiment |
| ACCESS1-0      | r1i1p1 | hist, rcp85 | ACCESS-CM2      | r1i1p1f1 | hist, ssps |
| ACCESS1-3      | r1i1p1 | hist, rcp85 | AWI-ESM-1-1-LR  | r1i1p1f1 | hist       |
| BNU-ESM        | r1i1p1 | hist, rcp85 | BCC-CSM2-MR     | r1i1p1f1 | hist, ssps |
| CMCC-CESM      | r1i1p1 | hist, rcp85 | BCC-ESM1        | r1i1p1f1 | hist       |
| CMCC-CM        | r1i1p1 | hist, rcp85 | CanESM5         | r1i1p1f1 | hist, ssps |
| CMCC-CMS       | r1i1p1 | hist, rcp85 | CESM2-FV2       | r1i1p1f1 | hist       |
| CNRM-CM5       | r1i1p1 | hist, rcp85 | CESM2           | r1i1p1f1 | hist       |
| CanESM2        | r1i1p1 | hist, rcp85 | CESM2-WACCM-FV2 | r1i1p1f1 | hist       |
| FGOALS-g2      | r1i1p1 | hist, rcp85 | CESM2-WACCM     | r1i1p1f1 | hist, ssps |
| GFDL-CM3       | r1i1p1 | hist, rcp85 | CNRM-CM6-1-HR   | r1i1p1f2 | hist, ssps |
| GFDL-ESM2G     | r1i1p1 | hist        | CNRM-CM6-1      | r1i1p1f2 | hist, ssps |
| HadGEM2-CC     | r1i1p1 | hist, rcp85 | CNRM-ESM2-1     | r1i1p1f2 | hist, ssps |
| HadGEM2-ES     | r1i1p1 | hist        | EC-Earth3       | r1i1p1f1 | hist, ssps |
| IPSL-CM5A-LR   | r1i1p1 | hist        | FGOALS-f3-L     | r1i1p1f1 | hist       |
| IPSL-CM5A-MR   | r1i1p1 | hist        | FGOALS-g3       | r1i1p1f1 | hist, ssps |
| IPSL-CM5B-LR   | r1i1p1 | hist        | GFDL-CM4        | r1i1p1f1 | hist       |
| MIROC-ESM-CHEM | r1i1p1 | hist, rcp85 | GISS-E2-1-G     | r1i1p1f1 | hist       |
| MIROC-ESM      | r1i1p1 | hist, rcp85 | GISS-E2-1-G     | r1i1p1f2 | hist       |
| MIROC5         | r1i1p1 | hist, rcp85 | HadGEM3-GC31-LL | r1i1p1f3 | hist       |
| MPI-ESM-LR     | r1i1p1 | hist        | HadGEM3-GC31-MM | r1i1p1f3 | hist       |
| MPI-ESM-MR     | r1i1p1 | hist, rcp85 | INM-CM4-8       | r1i1p1f1 | hist, ssps |
| MPI-ESM-P      | r1i1p1 |             | INM-CM5-0       | r1i1p1f1 | hist, ssps |
| MRI-CGCM3      | r1i1p1 | hist, rcp85 | IPSL-CM6A-LR    | r1i1p1f1 | hist, ssps |
| MRI-ESM1       | r1i1p1 | hist, rcp85 | KACE-1-0-G      | r1i1p1f1 | hist       |

|              |        |             |                 |          |            |
|--------------|--------|-------------|-----------------|----------|------------|
| NorESM1-M    | r1i1p1 | hist, rcp85 | MIROC6          | r1i1p1f1 | hist, ssps |
| bcc-csm1-1-m | r1i1p1 | hist        | MPI-ESM-1-2-HAM | r1i1p1f1 | hist       |
| bcc-csm1-1   | r1i1p1 | hist, rcp85 | MPI-ESM1-2-HR   | r1i1p1f1 | hist, ssps |
|              |        |             | MPI-ESM1-2-LR   | r1i1p1f1 | hist, ssps |
|              |        |             | MRI-ESM2-0      | r1i1p1f1 | hist, ssps |
|              |        |             | NorESM2-LM      | r1i1p1f1 | hist, ssps |
|              |        |             | NorESM2-MM      | r1i1p1f1 | hist, ssps |
|              |        |             | TaiESM1         | r1i1p1f1 | hist       |
|              |        |             | UKESM1-0-LL     | r1i1p1f2 | hist, ssps |

Table S2. Standard deviation of the drivers used in Section 4.2, before standardization.

|         | AA   | NAW  | PST  | UTW  |
|---------|------|------|------|------|
| std dev | 0.16 | 0.22 | 0.11 | 0.41 |

Table S3. Cross-correlations of the standardized drivers used in Section 4.2 and Global Warming (GW).

|     | GW     | UTW    | AA     | NAW    | PST |
|-----|--------|--------|--------|--------|-----|
| GW  | 1.     |        |        |        |     |
| UTW | 0.31   | 1.     |        |        |     |
| AA  | -0.404 | -0.152 | 1.     |        |     |
| NAW | -0.157 | -0.42  | 0.41   | 1.     |     |
| PST | 0.026  | 0.008  | -0.181 | -0.074 | 1.  |

Table S4. Cross-correlations of the drivers used in Section 4.2 and GW, before dividing by GW.

|     | GW     | UTW    | AA     | NAW    | PST |
|-----|--------|--------|--------|--------|-----|
| GW  | 1.     |        |        |        |     |
| UTW | 0.929  | 1.     |        |        |     |
| AA  | 0.839  | 0.756  | 1.     |        |     |
| NAW | 0.886  | 0.769  | 0.853  | 1.     |     |
| PST | -0.077 | -0.073 | -0.175 | -0.172 | 1.  |

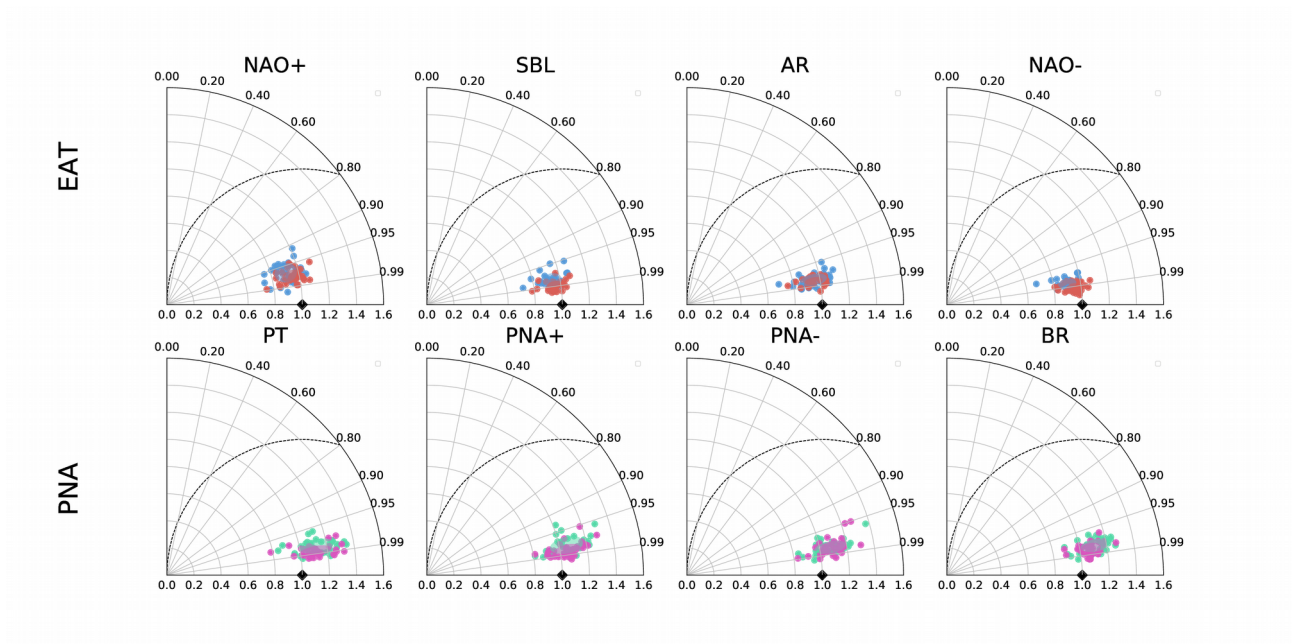

Figure S1. As Figure 2, but for the *projected regimes*.

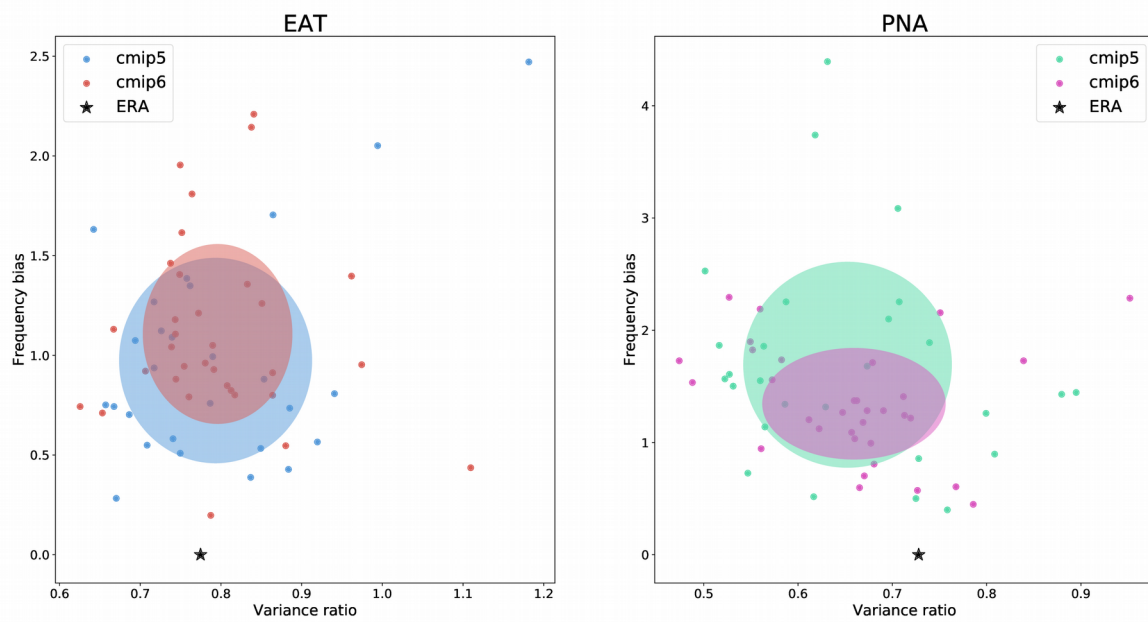

Figure S2. As Figure 3, but for the *projected regimes*.

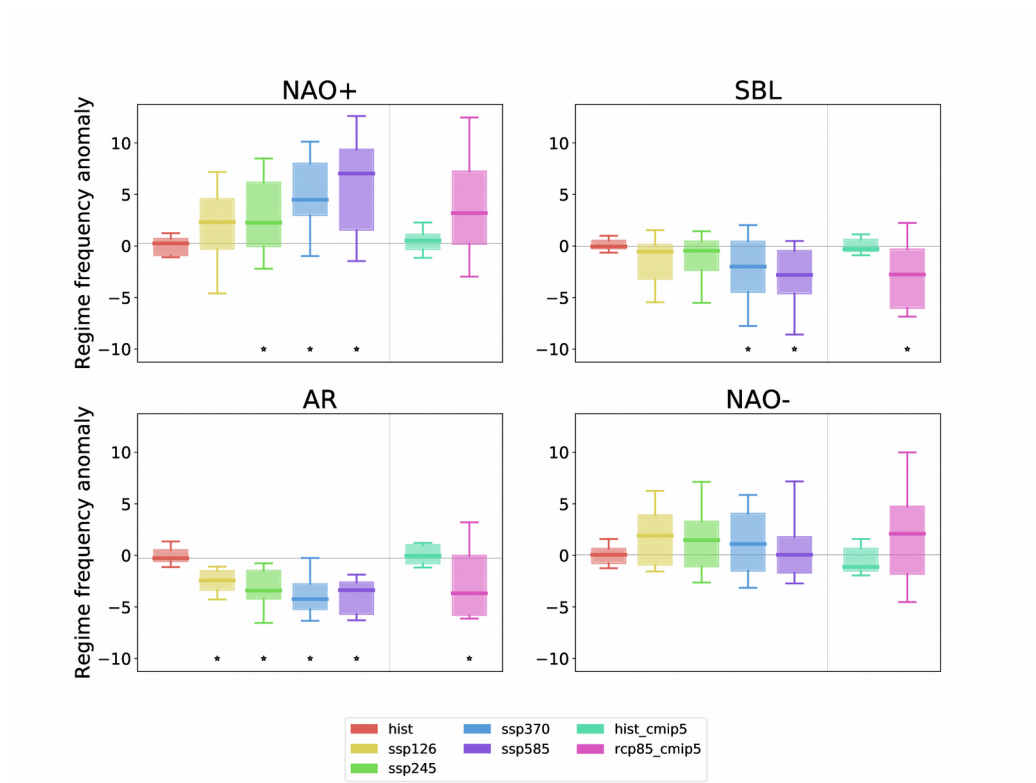

Figure S3. As Figure 4, but showing also the cmp5 historical frequency.

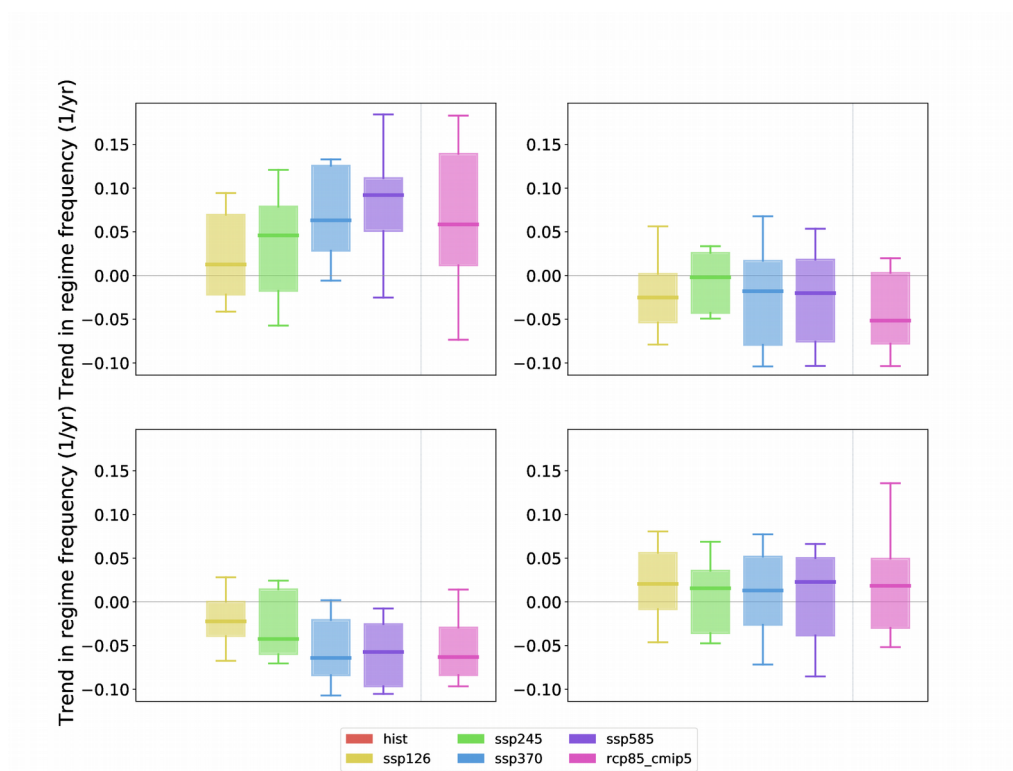

Figure S4. Trend of the seasonal regime frequencies (with 10-yr running mean) over 2015-2100 for EAT. The trend is in units of yr-1.

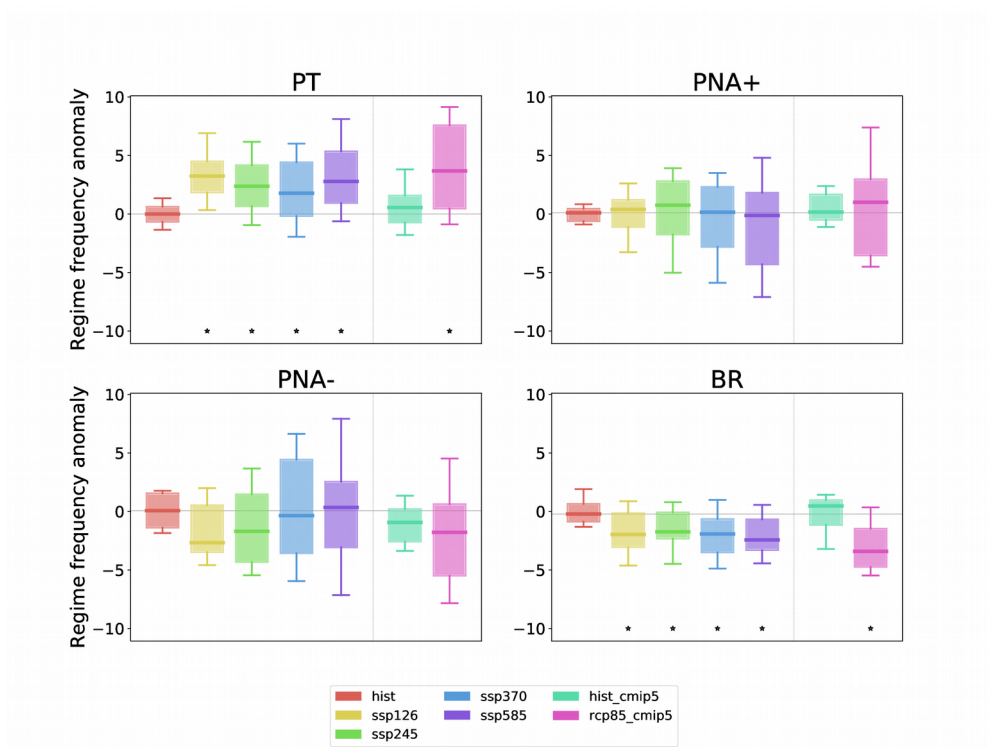

Figure S5. As Figure 6, but showing also the cmip5 historical frequency.

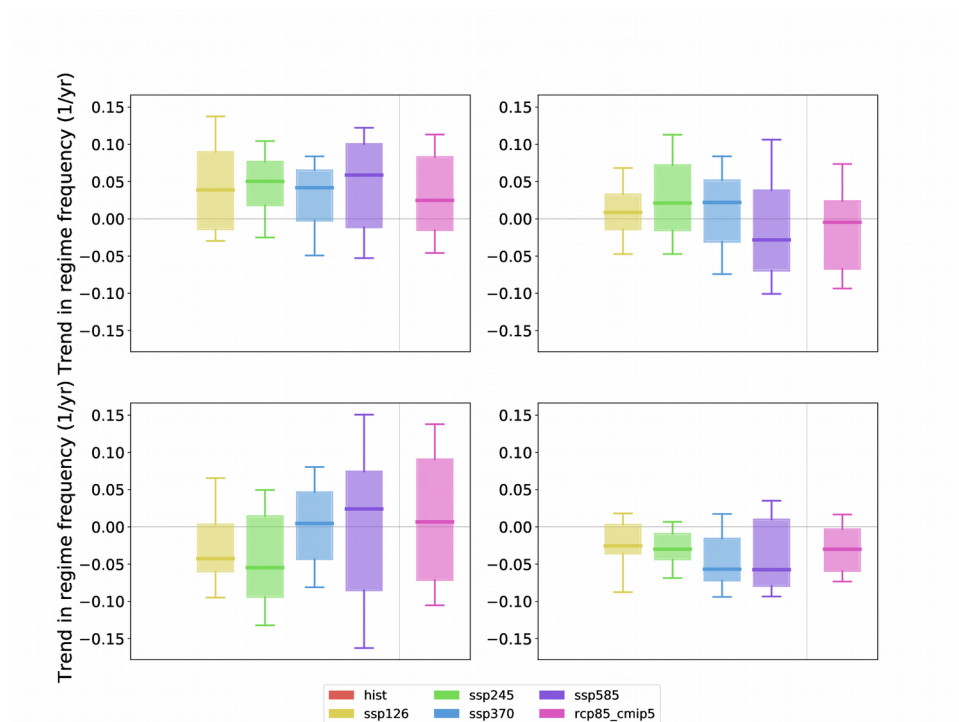

Figure S6. Trend of the seasonal regime frequencies (with 10-yr running mean) over 2015-2100 for PNA. The trend is in units of yr<sup>-1</sup>.
